# Supplementary material for: Occurrence frequency of Kelvin‐Helmholtz instability assessed by global high-resolution radiosonde and ERA5 reanalysis
Source: Copernicus journal article supplement (doi:10.5194/acp-2022-851), 2023-02-20
Supplement: Supplementary file 1 [file acp-2022-851-supplement.pdf]

*Supplementary Materials for*

**Occurrence frequency of Kelvin Helmholtz instability  
assessed by global high-resolution radiosonde and ERA5  
reanalysis**

Jia Shao<sup>1</sup>; Jian Zhang<sup>2\*</sup>; Wuke Wang<sup>3</sup>; Shaodong Zhang<sup>4</sup>; Tao Yu<sup>2</sup>; Wenjun Dong<sup>5,6</sup>

<sup>1</sup> College of Informatics, Huazhong Agricultural University, Wuhan 430070, China

<sup>2</sup> Hubei Subsurface Multi-scale Imaging Key Laboratory, School of Geophysics and  
Geomatics, China University of Geosciences, Wuhan 430074, China

<sup>3</sup> School of environmental studies, China University of Geosciences, Wuhan 430074,  
China

<sup>4</sup> School of Electronic Information, Wuhan University, Wuhan 430072, China

<sup>5</sup> Center for Space and Atmospheric Research (CSAR), Embry-Riddle Aeronautical  
University, Daytona Beach, FL, USA

<sup>6</sup> Global Atmospheric Technologies and Sciences (GATS), Boulder, CO, USA

**This supplementary file contains Figures S1-5**

Correspondence to:

Dr. Jian Zhang (Email: [zhangjian@cug.edu.cn](mailto:zhangjian@cug.edu.cn))

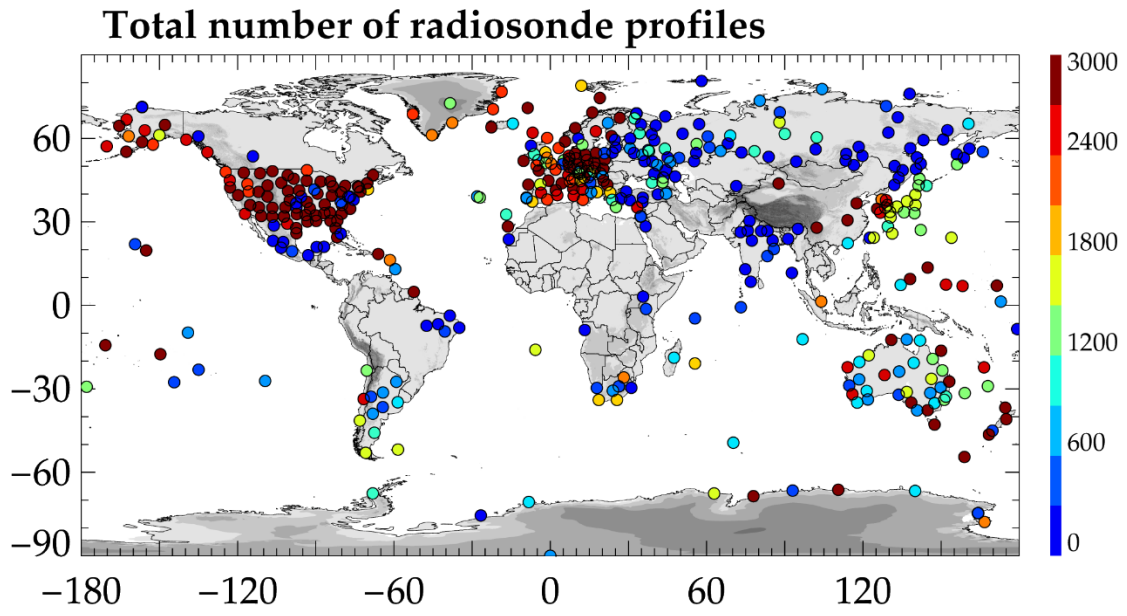

**Figure S1.** Total released soundings over each station.

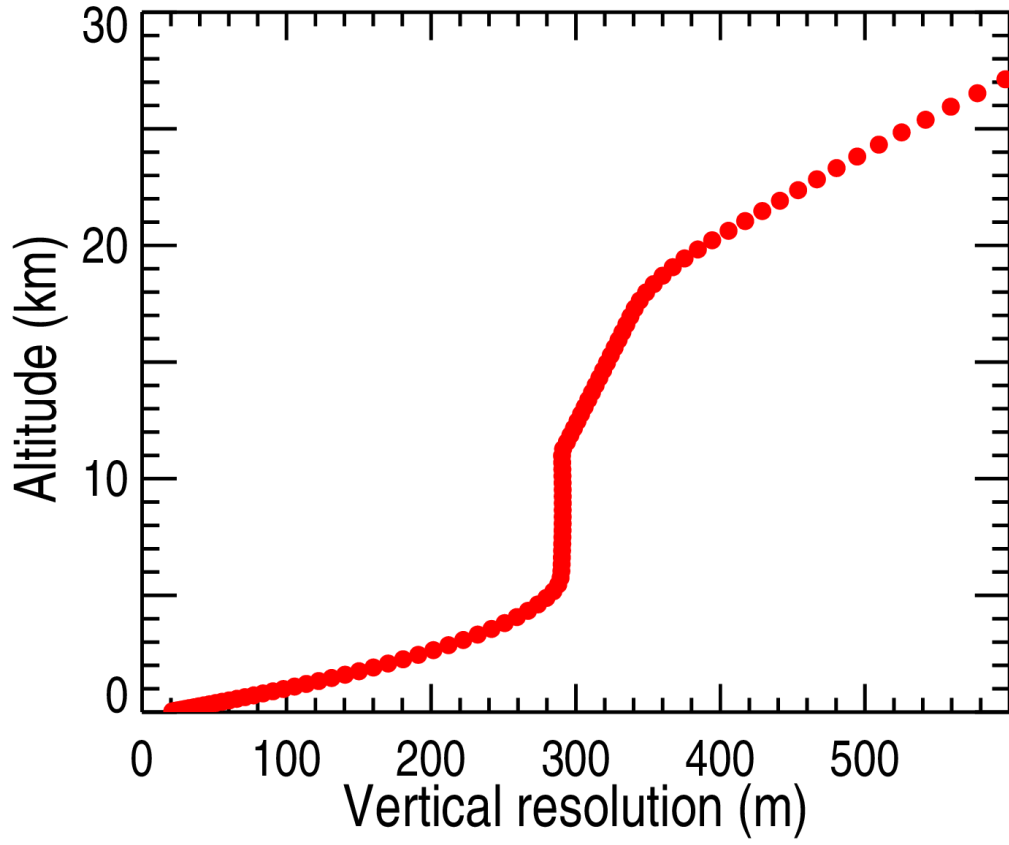

**Figure S2.** Vertical resolution of ERA5 at different heights.

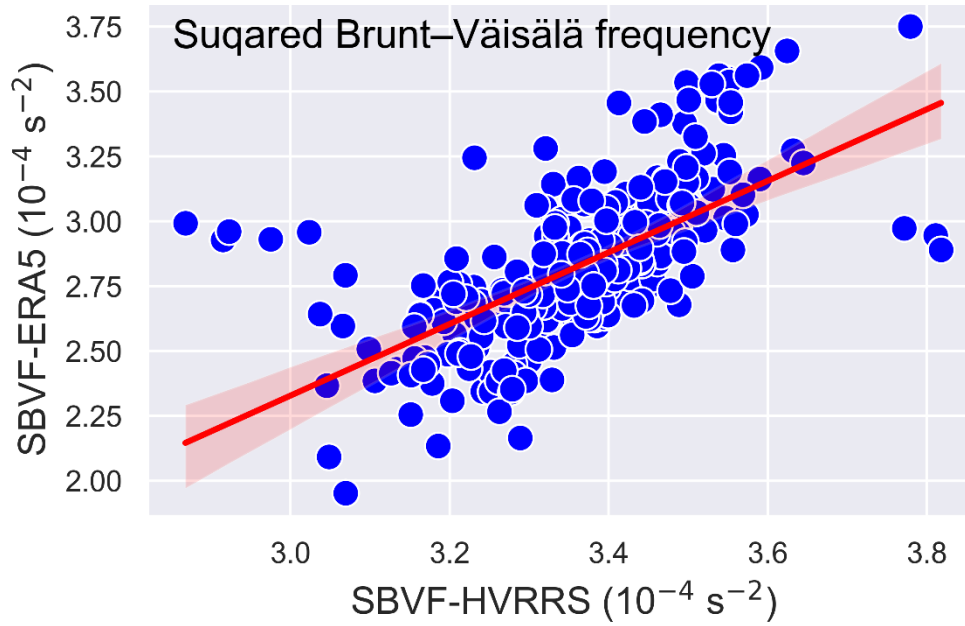

**Figure S3.** The joint distributions of HVRRS-retrieved and ERA5-determined squared Brunt-väisälä frequency together with the linear regression (red line). The light red shadow denotes a significance of 95%. The Brunt-väisälä frequency is averaged from the ground to 30 km a.g.l during the whole study period. The ERA5 derived  $N^2$  is spatially and temporally collocated with that of HVRRS.

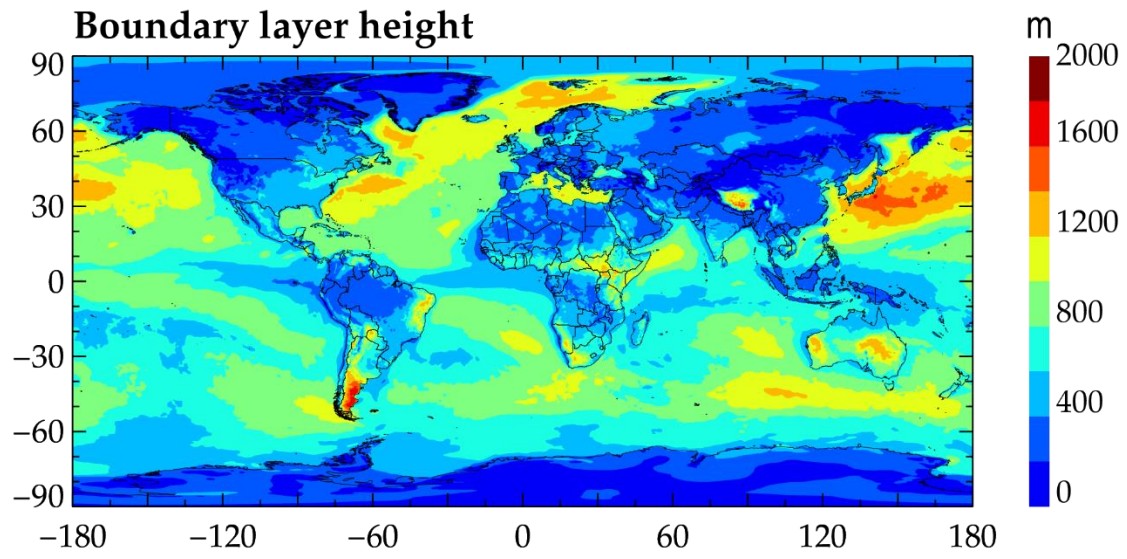

**Figure S4.** The averaged planetary boundary layer height during years 2017 to 2022.

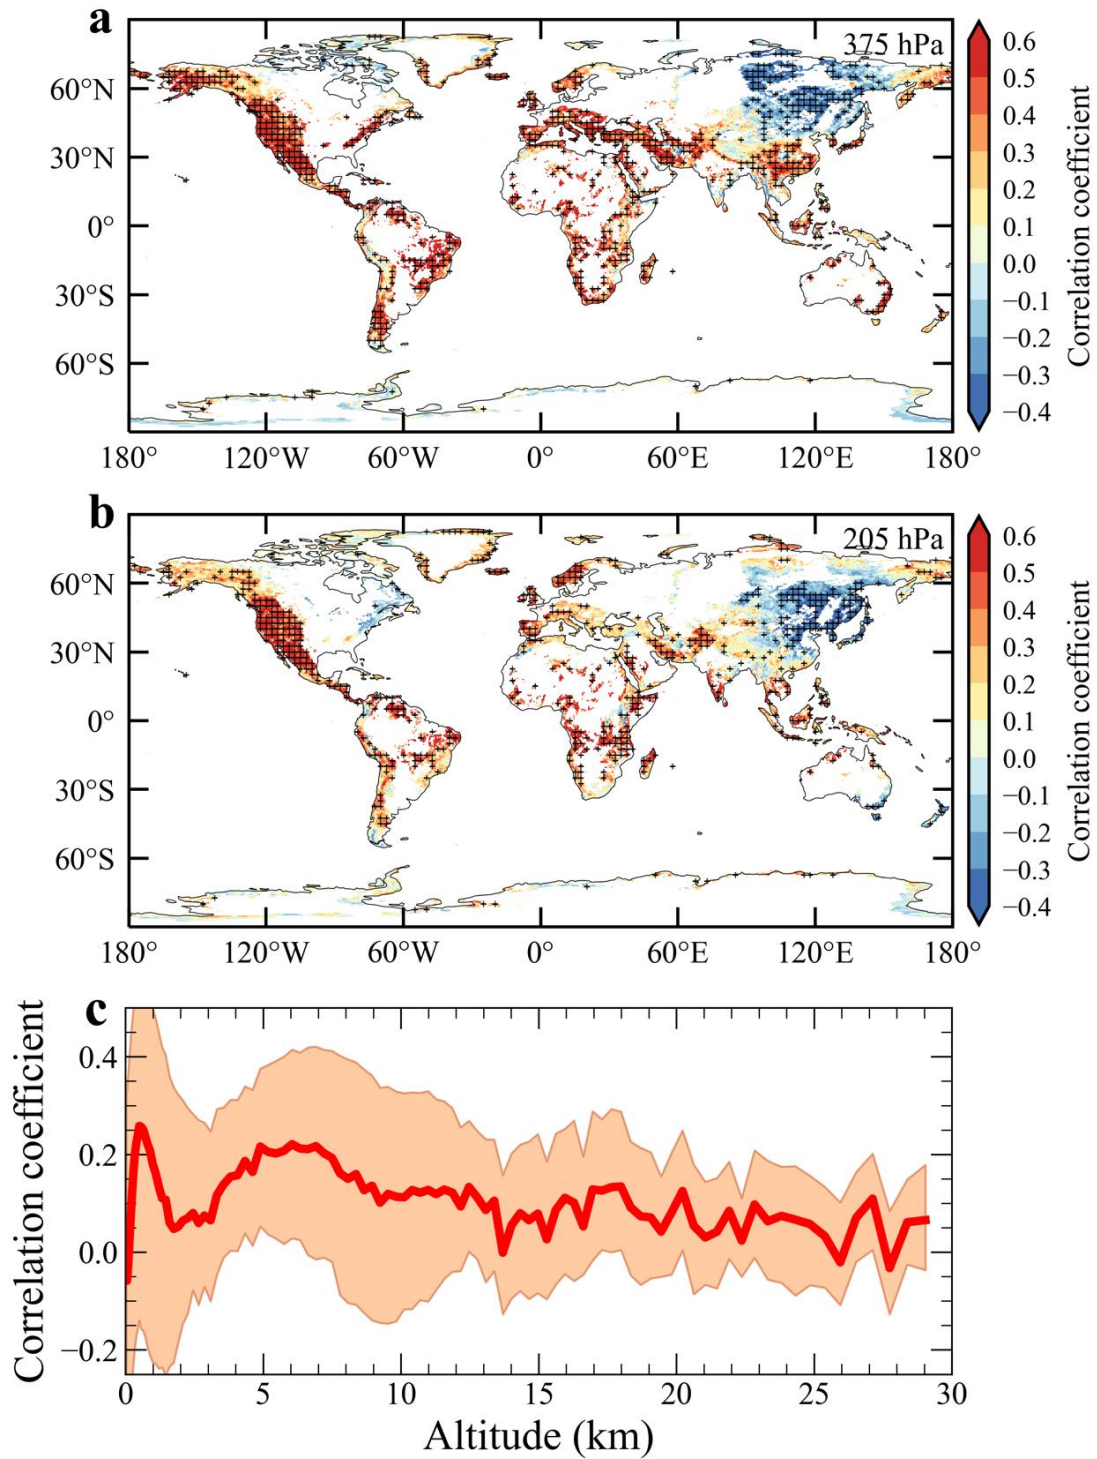

**Figure S5.** The correlation coefficient between ERA5-based orographic GW dissipation and ERA5-based KHI occurrence frequency at pressure levels of 375 hPa (a) and 205 hPa (b), where plus signs indicate that the values are statistically significant ( $p < 0.05$ ). The coefficient at continuous heights from the ground up to 30 km is further displayed in (c), where the light red shadow denotes a significance of 95%.
